# Supplementary material for: CO2 free production of ethylene oxide via liquid phase epoxidation of ethylene using niobium oxide incorporated mesoporous silica material as the catalyst
Source: Royal Society of Chemistry journal article supplement (doi:10.1039/d2ra07240h), 2023-01-01
Supplement: d2ra07240h1.pdf [file d2ra07240h1.pdf]

**CO<sub>2</sub> free production of ethylene oxide via liquid phase epoxidation of ethylene using niobium oxide incorporated mesoporous silica material as catalyst**

Muhammad Maqbool<sup>a</sup>, Toheed Akhter<sup>a,\*</sup>, Muhammad Faheem<sup>a</sup>, Sohail Nadeem<sup>a</sup>, Chan Ho Park<sup>b,\*</sup>, Asif Mahmood<sup>c,\*</sup>

<sup>a</sup>Department of chemistry, University of Management and Technology, C-II, Johar Town, Lahore, 54770, Pakistan.

<sup>b</sup>Department of Chemical and Biological Engineering, Gachon University, Seongnam, 13120, Republic of Korea

<sup>c</sup>College of Engineering, Department of Chemical Engineering, King Saud University, 11421 Riyadh, Saudi Arabia

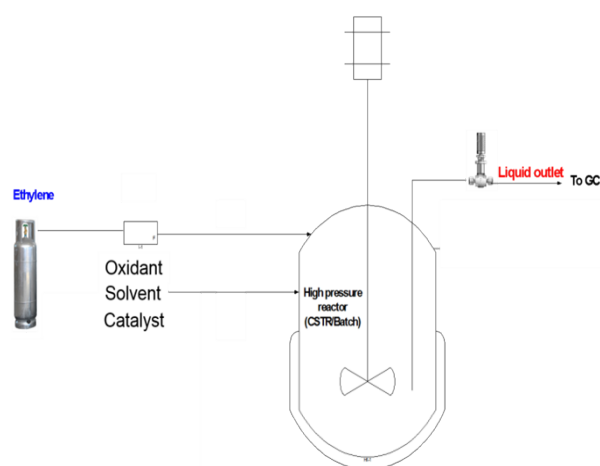

**Fig S1.** Schematic diagram of the reactor for the production of EO
